# Supplementary material for: In situ growth of MOF-derived nitrogen-doped carbon nanotubes on hollow MXene spheres for K-ion storage
Source: Royal Society of Chemistry journal article supplement (doi:10.1039/d3qi00763d), 2023-01-01
Supplement: d3qi00763d1.pdf [file d3qi00763d1.pdf]

**In-situ growth of MOF-derived nitrogen-doped carbon nanotubes on  
hollow MXene spheres for K-ion storage**

Xiaoyu Chen, Shuanghong Xia, Tianyu Tan, Yajing Zhu, Ling Li\*, Qiancheng Zhu\*,  
Wenming Zhang\*

*Province-Ministry Co-construction Collaborative Innovation Center of Hebei  
Photovoltaic Technology, College of Physics Science and Technology, Hebei  
University, Baoding, Hebei 071002, China*

**Corresponding author at:**

E-mail: lilinghbu@163.com (L. Li), whqianchengzhu@163.com (Q. Zhu),  
wmzhanghbu@126.com (W. Zhang)

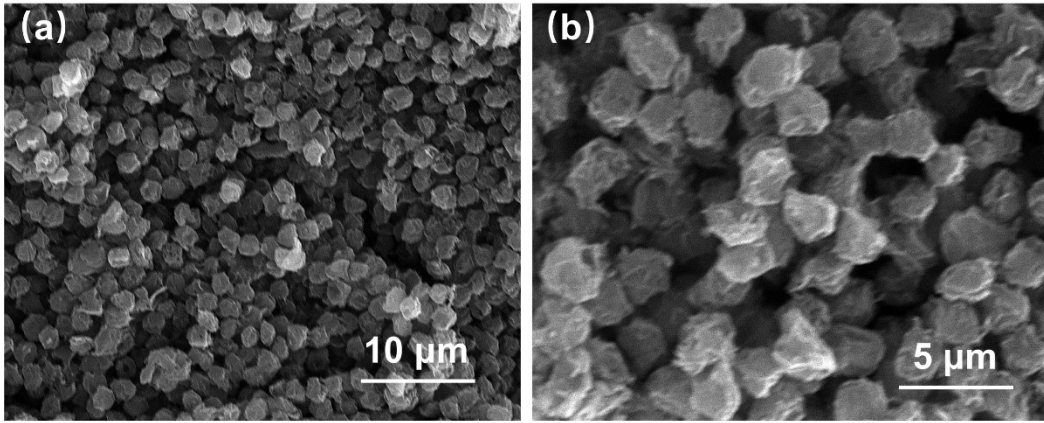

**Figure S1** Scanning electron microscopy (SEM) images of SMXene.

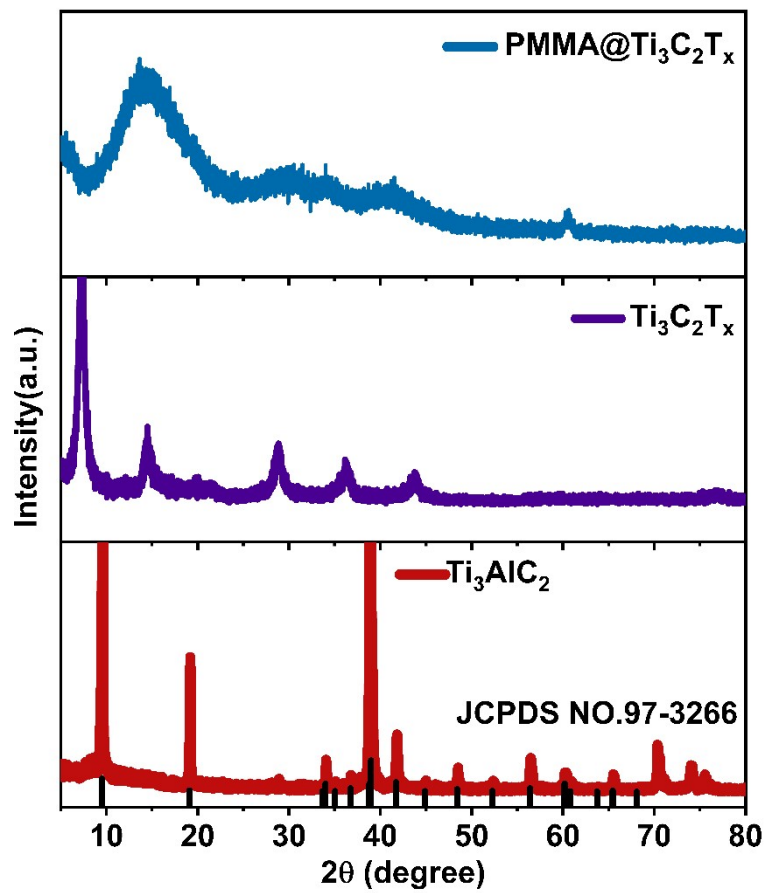

**Figure S2** XRD patterns of  $\text{Ti}_3\text{AlT}_x$ ,  $\text{Ti}_3\text{C}_2\text{T}_x$ , and  $\text{PMMA@Ti}_3\text{C}_2\text{T}_x$ .

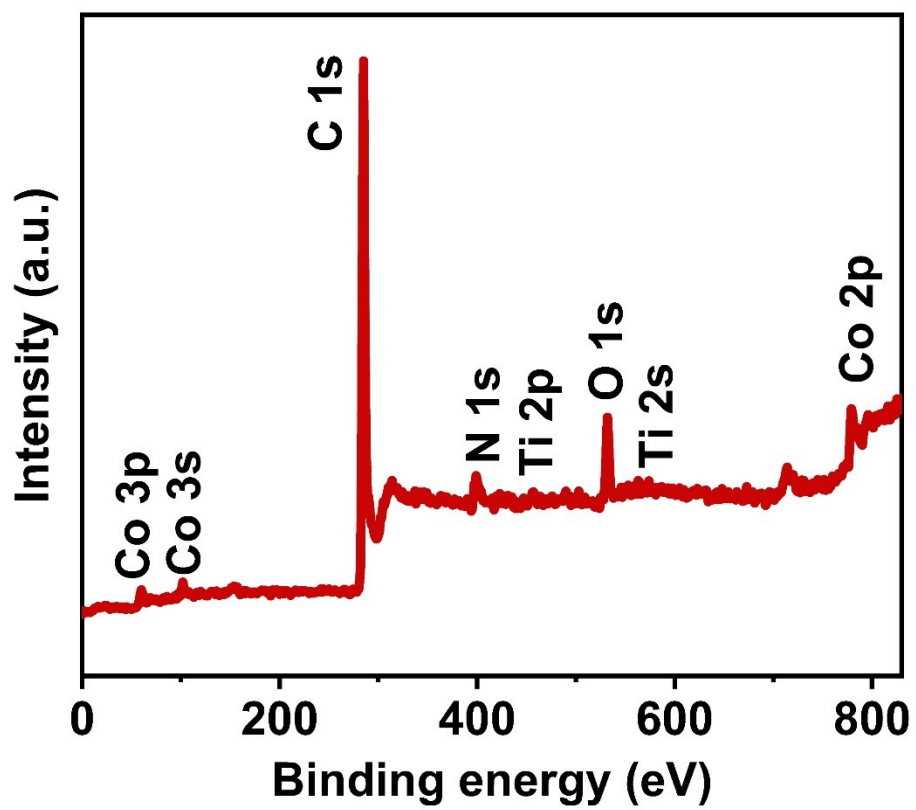

Figure S3 XPS spectra of CoN-CNT@SMXene.

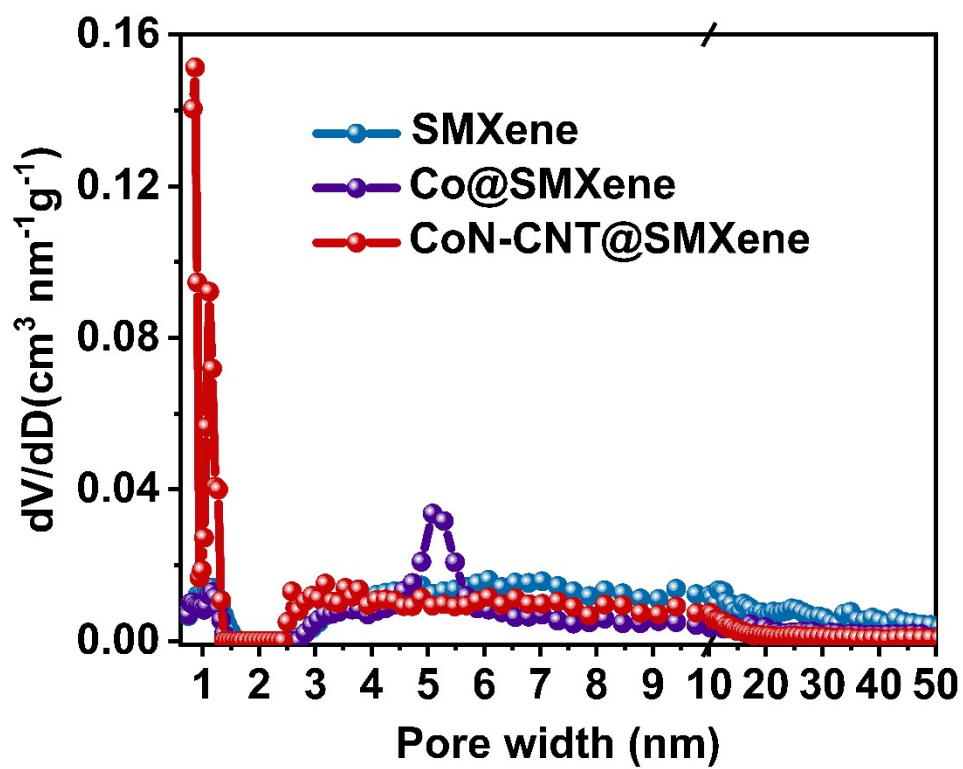

Figure S4 The pore size distribution curves obtained by DFT method.

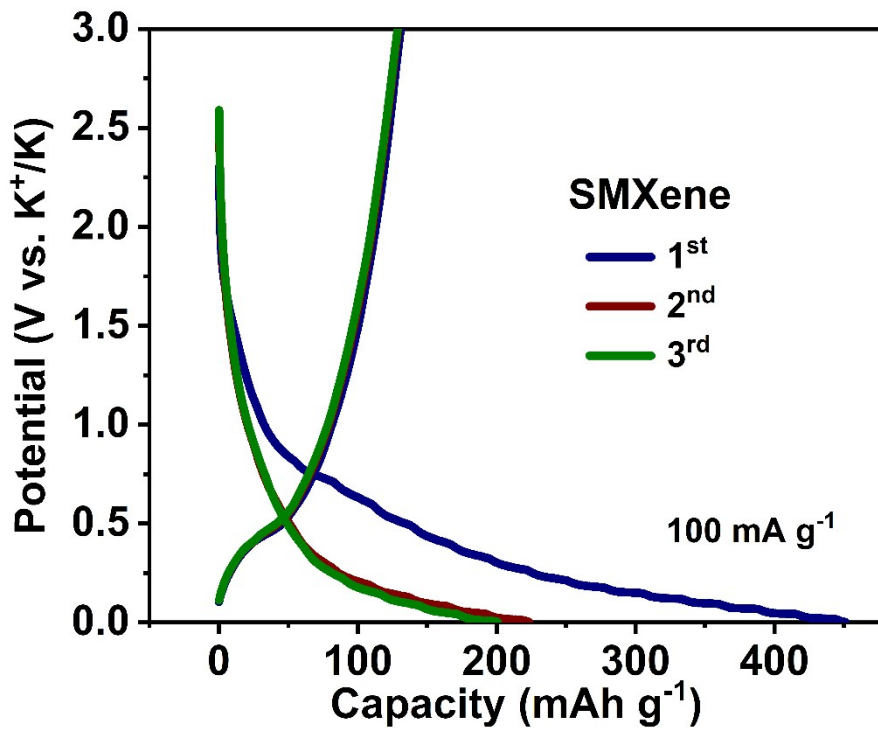

Figure S5 Discharge-charge profiles of SMXene at 0.1 A g<sup>-1</sup> at different cycles.

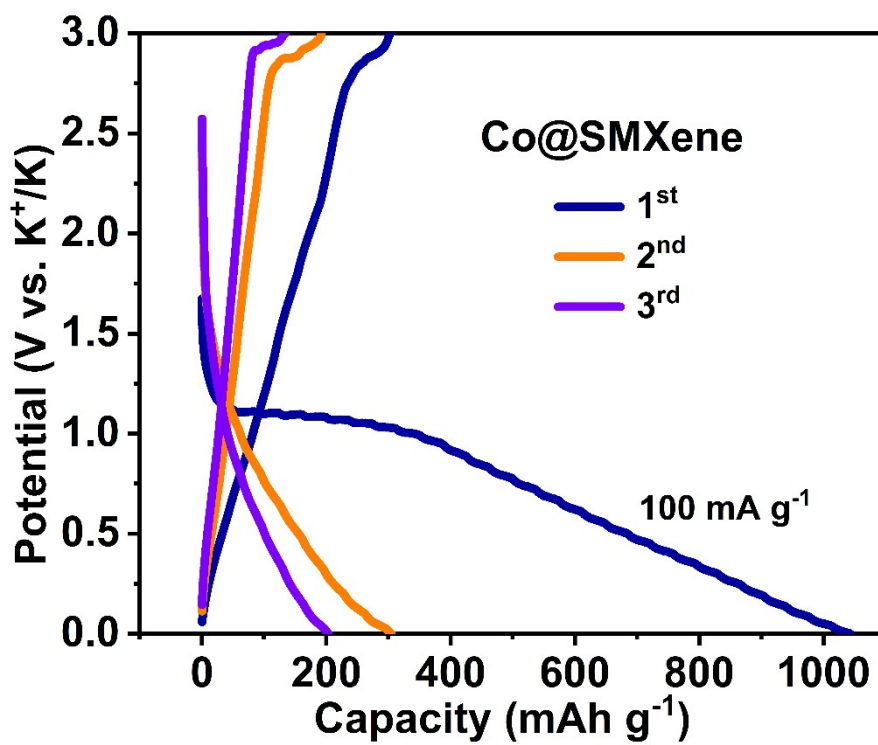

Figure S6 Discharge-charge profiles of Co@SMXene at 0.1 A g<sup>-1</sup> at different cycles.

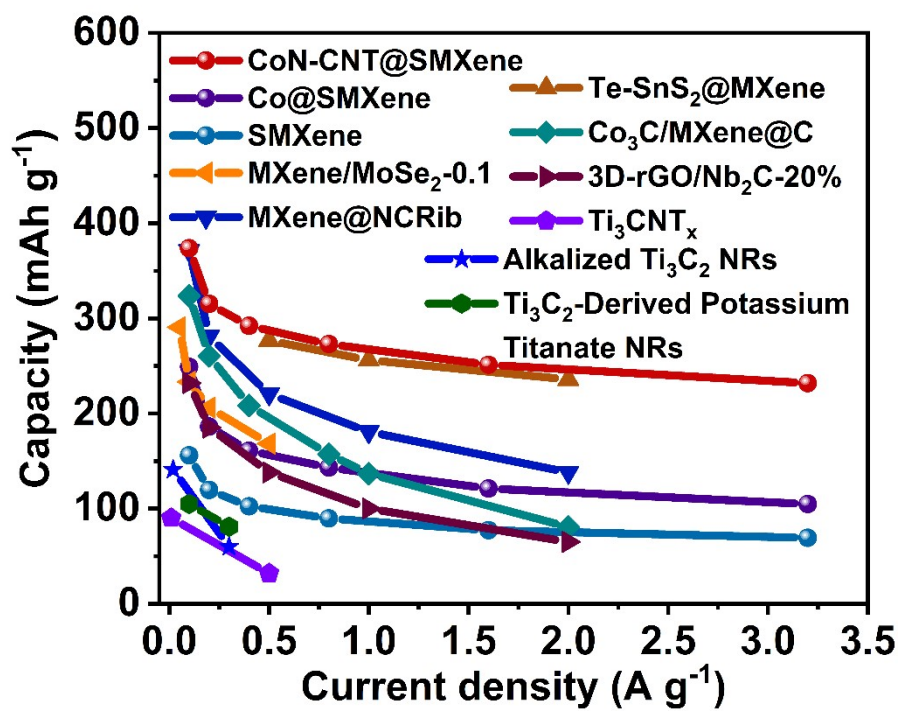

Figure S7 Comparison of rate capability with the reported work.



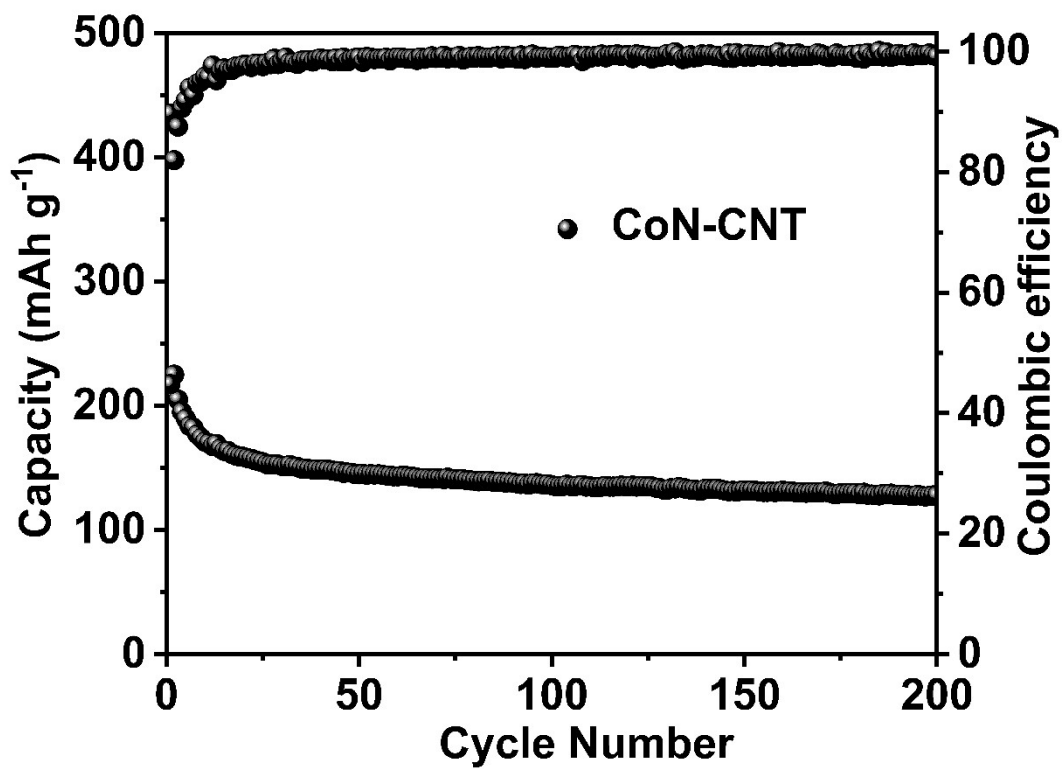

Figure S8 Cycling performance of CoN-CNT electrodes at 0.1 A g<sup>-1</sup> for 200 cycles.

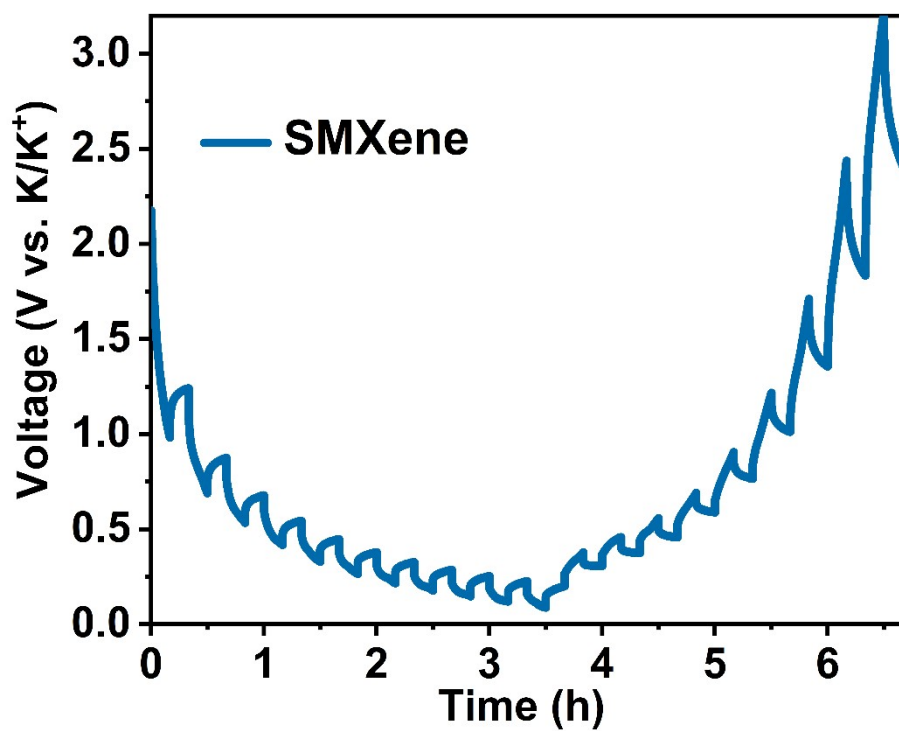

**Figure S9** GITT potential profiles for SMXene.

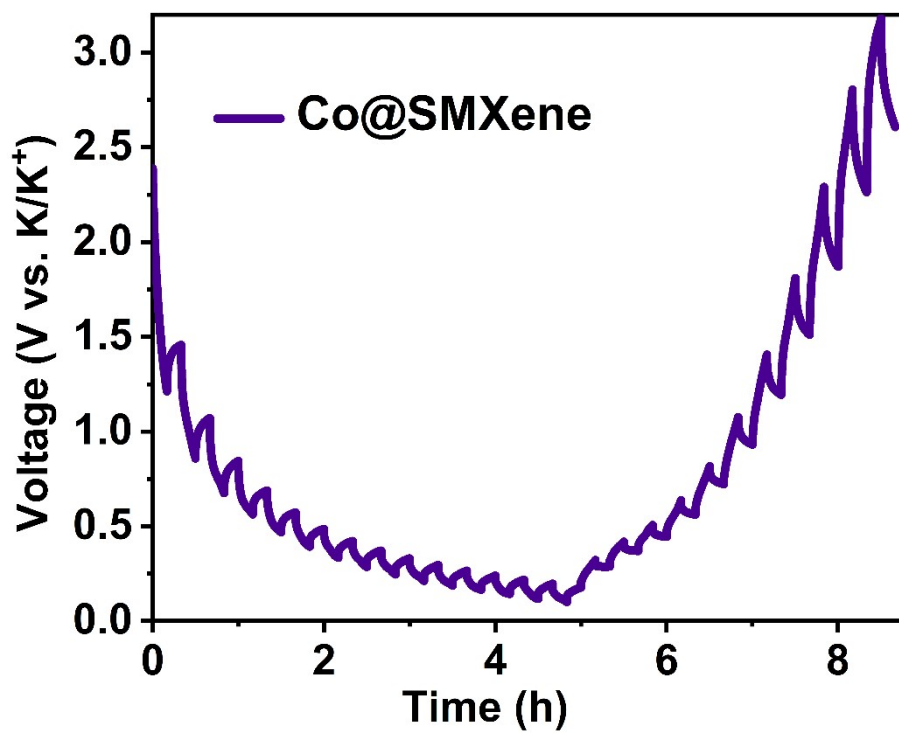

**Figure S10** GITT potential profiles for Co@SMXene.

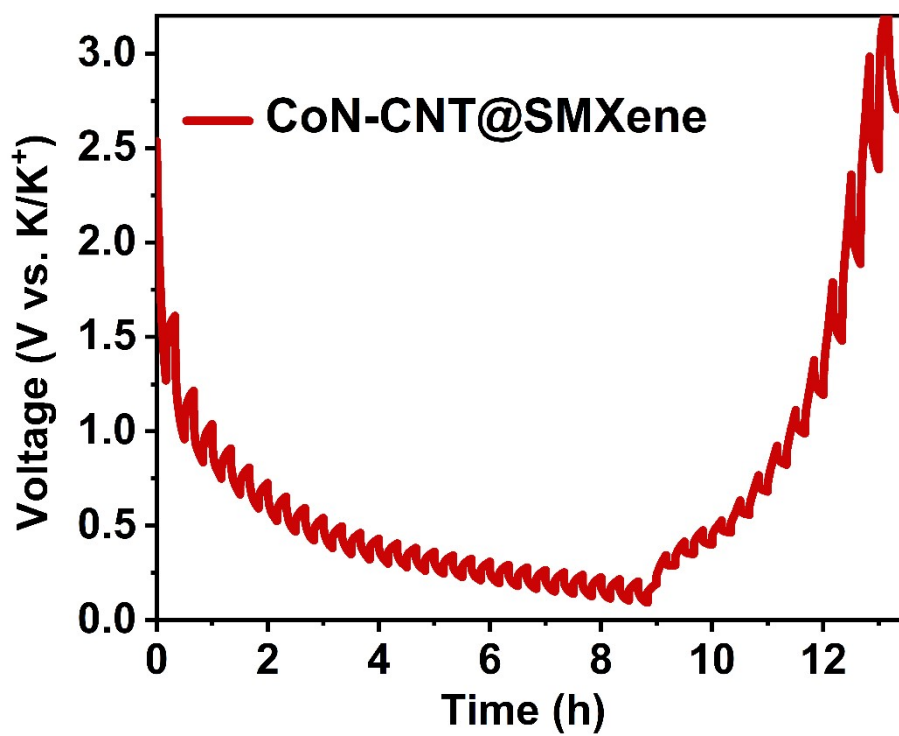

**Figure S11** GITT potential profiles for Co-CNT@SMXene.

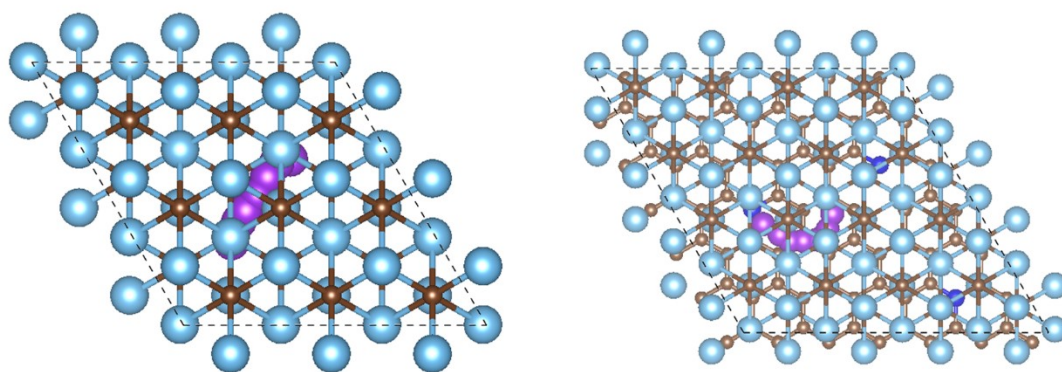

**Figure S12** The migration path of  $K^+$  in  $Ti_3C_2$  and  $Ti_3C_2/CN$ .

**Table S1** The detailed determination of cobalt, titanium, carbon and nitrogen calculated by means of ICP-MS and EA methods for the CoN-CNT@SMXene.

| Methods | Sample weight<br>(mg) | Co (g/kg) | Ti<br>(g/kg) | C (%)   | N (%)   |
|---------|-----------------------|-----------|--------------|---------|---------|
| ICP-MS  | 0.0132                | 49.8945   | 6.5936       | -       | -       |
| EA      | 1.27                  | -         | -            | 56.7608 | 37.5904 |

**Table S2** The specific surface area.

|                  | SMXene                               | Co@SMXene                           | CoN-CNT@SMXene                       |
|------------------|--------------------------------------|-------------------------------------|--------------------------------------|
| BET Surface area | 153.4 m <sup>2</sup> g <sup>-1</sup> | 91.6 m <sup>2</sup> g <sup>-1</sup> | 253.8 m <sup>2</sup> g <sup>-1</sup> |
| DFT pore size    | 6.079 nm                             | 5.086 nm                            | 0.863 nm                             |

**Table S3** Comparison of performances of MXene-based materials in PIBs.

| Materials                                                            | Current density (mA g <sup>-1</sup> ) | Capacity (mAh g <sup>-1</sup> ) | Ref.         |
|----------------------------------------------------------------------|---------------------------------------|---------------------------------|--------------|
| CoN-<br>CNT@SMXene                                                   | 100                                   | 373.6                           | This<br>work |
| MXene/MoSe <sub>2</sub> -0.1                                         | 100                                   | 233.1                           | Ref. 1       |
| MXene@NCRib                                                          | 200                                   | 281.4                           | Ref. 2       |
| Te-SnS <sub>2</sub> @MXene                                           | 500                                   | 276.7                           | Ref. 3       |
| Co <sub>3</sub> C/MXene@C                                            | 100                                   | 323.7                           | Ref. 4       |
| Ti <sub>3</sub> CNT <sub>x</sub>                                     | 500                                   | 32                              | Ref. 5       |
| Alkalized Ti <sub>3</sub> C <sub>2</sub> NRs                         | 300                                   | 60                              | Ref. 6       |
| Ti <sub>3</sub> C <sub>2</sub> -Derived<br>Potassium Titanate<br>NRs | 100                                   | 105                             | Ref. 7       |



**Table S4** Comparison of performances of anode materials in PIBs.

| Materials                                         | Current density (mA g <sup>-1</sup> )<br>1) | Capacity (mAh g <sup>-1</sup> ) | Ref.         |
|---------------------------------------------------|---------------------------------------------|---------------------------------|--------------|
| CoN-<br>CNT@SMXene                                | 100                                         | 373.6                           | This<br>work |
| K <sub>2</sub> V <sub>3</sub> O <sub>8</sub>      | 100                                         | 242                             | Ref. 8       |
| N-doped hierarchical<br>porous carbon             | 100                                         | 263.6                           | Ref. 9       |
| Porous carbon<br>microspheres                     | 100                                         | 264.5                           | Ref. 10      |
| Bi <sub>2</sub> O <sub>3</sub> @C                 | 500                                         | 233                             | Ref. 11      |
| ZnS@C                                             | 100                                         | 270                             | Ref. 12      |
| Bi <sub>2</sub> Sn <sub>2</sub> O <sub>7</sub> /C | 50                                          | 295                             | Ref. 13      |

## References

- [1] J. Li, B. Rui, W. Wei, P. Nie, L. Chang, Z. Le, M. Liu, H. Wang, L. Wang, X. Zhang, Nanosheets assembled layered MoS<sub>2</sub>/MXene as high performance anode materials for potassium ion batteries, *Journal of Power Sources*, 2020, **449**, 227481.
- [2] J. Cao, Z. Sun, J. Li, Y. Zhu, Z. Yuan, Y. Zhang, D. Li, L. Wang, W. Han, Microbe-Assisted assembly of Ti<sub>3</sub>C<sub>2</sub>T<sub>x</sub> MXene on fungi-derived nanoribbon heterostructures for ultrastable sodium and potassium ion storage, *ACS nano*, 2021, **15**, 3423-3433.
- [3] H. Sun, Y. Zhang, X. Xu, J. Zhou, F. Yang, H. Li, H. Chen, Y. Chen, Z. Liu, Z. Qiu, D. Wang, L. Ma, J. Wang, Q. Zeng, Z. Peng, Strongly coupled Te-SnS<sub>2</sub>/MXene superstructure with self-autoadjustable function for fast and stable potassium ion storage, *Journal of Energy Chemistry*, 2021, **61**, 416-424.
- [4] H. Zhang, D. Xiong, Y. Xie, K. Wu, Z. Feng, K. Wen, Z. Li, M. He, Co<sub>3</sub>C/Mxene composites wrapped in N-rich carbon as stable-performance anodes for potassium/sodium-ion batteries, *Colloids and Surfaces A: Physicochemical and Engineering Aspects*, 2023, **656**, 130332.
- [5] M. Naguib, R. A. Adams, Y. Zhao, D. Zemlyanov, A. Varma, J. Nanda, V. G. Pol, Electrochemical performance of MXenes as K-ion battery anodes, *Chemical Communications*, 2017, **53**, 6883-6886.
- [6] P. Lian, Y. Dong, Z-S. Wu, S. Zheng, X. Wang, S. Wang, C. Sun, J. Qin, X. Shi, X. Bao, Alkalized Ti<sub>3</sub>C<sub>2</sub> MXene nanoribbons with expanded interlayer spacing for high-capacity sodium and potassium ion batteries, *Nano Energy*, 2017, **40**, 1-8.
- [7] Y. Dong, Z-S. Wu, S. Zheng, X. Wang, J. Qin, S. Wang, X. Shi, X. Bao, Ti<sub>3</sub>C<sub>2</sub>

MXene-derived sodium/potassium titanate nanoribbons for high-performance sodium/potassium ion batteries with enhanced capacities *ACS nano*, 2017, **11**, 4792-4800.

[8] M. Lu, K. Wang, H. Ke, Q. Hu, Z. Liu and H. Wu, Potassium vanadate  $K_2V_3O_8$  as a superior anode material for potassium-ion batteries, *Mater. Lett.* 2018, **232**, 224-227.

[9] C. Gao, Q. Wang, S. Luo, Z. Wang, Y. Zhang, Y. Liu, A. Hao and R. Guo, High performance potassium-ion battery anode based on biomorphic N-doped carbon derived from walnut septum, *J. Power Sources*, 2019, **415**, 165-171.

[10] S. Chen, K. Tang, F. Song, Z. Liu, N. Zhang, S. Lan, X. Xie and Z. Wu, Porous hard carbon spheres derived from biomass for high-performance sodium/potassium-ion batteries, *Nanotechnology*, 2022, **33**, 055401.

[11] H. Tong, S. Chen, J. Tu, X. Zeng, C. Wang, P. Wang and Q. Chen,  $Bi_2O_3$  particles embedded in carbon matrix as high-performance anode materials for potassium ion batteries, *J. Power Sources*, 2022, **549**, 232140.

[12] Y. Gan, M. Mu, M. Li, X. Ma, J. Yuan, H. He, X. Li, J. Mou, C. Zhang, X. Zhang and J. Liu, Trumpet-like  $ZnS@C$  composite for high-performance potassium ion battery anode, *Chem-Eur J.* 2023, DOI: 10.1002/chem.202300373.

[13] V. Ahuja, S. Baskar and P. Senguttuvan, Exploration of pyrochlore- $Bi_2Sn_2O_7$  as an anode for potassium-ion batteries, *ACS Appl. Energy Mater.* 2023, **6**, 3665–3670.
